# Supplementary material
Source: PubMed Central journal article supplement (PMC9339513)
Supplement: NIHMS1809434-supplement-Supplementary_Figure_2.pdf [file NIHMS1809434-supplement-Supplementary_Figure_2.pdf]

|                  |            |               |                 |             |                  |              |
|------------------|------------|---------------|-----------------|-------------|------------------|--------------|
|                  | Baril 2017 | Bradshaw 2015 |                 |             |                  |              |
| Bradshaw 2015    | 15%        |               |                 |             |                  |              |
| Debodinace 2017  | 18%        | 7.5%          | Debodinace 2017 |             |                  |              |
| French 2018      | 10%        | 19%           |                 | French 2018 |                  |              |
| Makrygianni 2010 | 0%         | 0%            |                 |             | Makrygianni 2010 |              |
| Reichow 2013     | 10%        | 8%            |                 |             |                  | Reichow 2013 |
| Warren 2011      | 14%        | 19%           |                 | 8%          | 29%              | 36%          |

|  |                     |
|--|---------------------|
|  | = Slight overlap    |
|  | = Moderate overlap  |
|  | = High overlap      |
|  | = Very High overlap |
