# Supplementary material
Source: PubMed Central journal article supplement (PMC9339513)

Bounded

Proximal

Unbounded

Distal

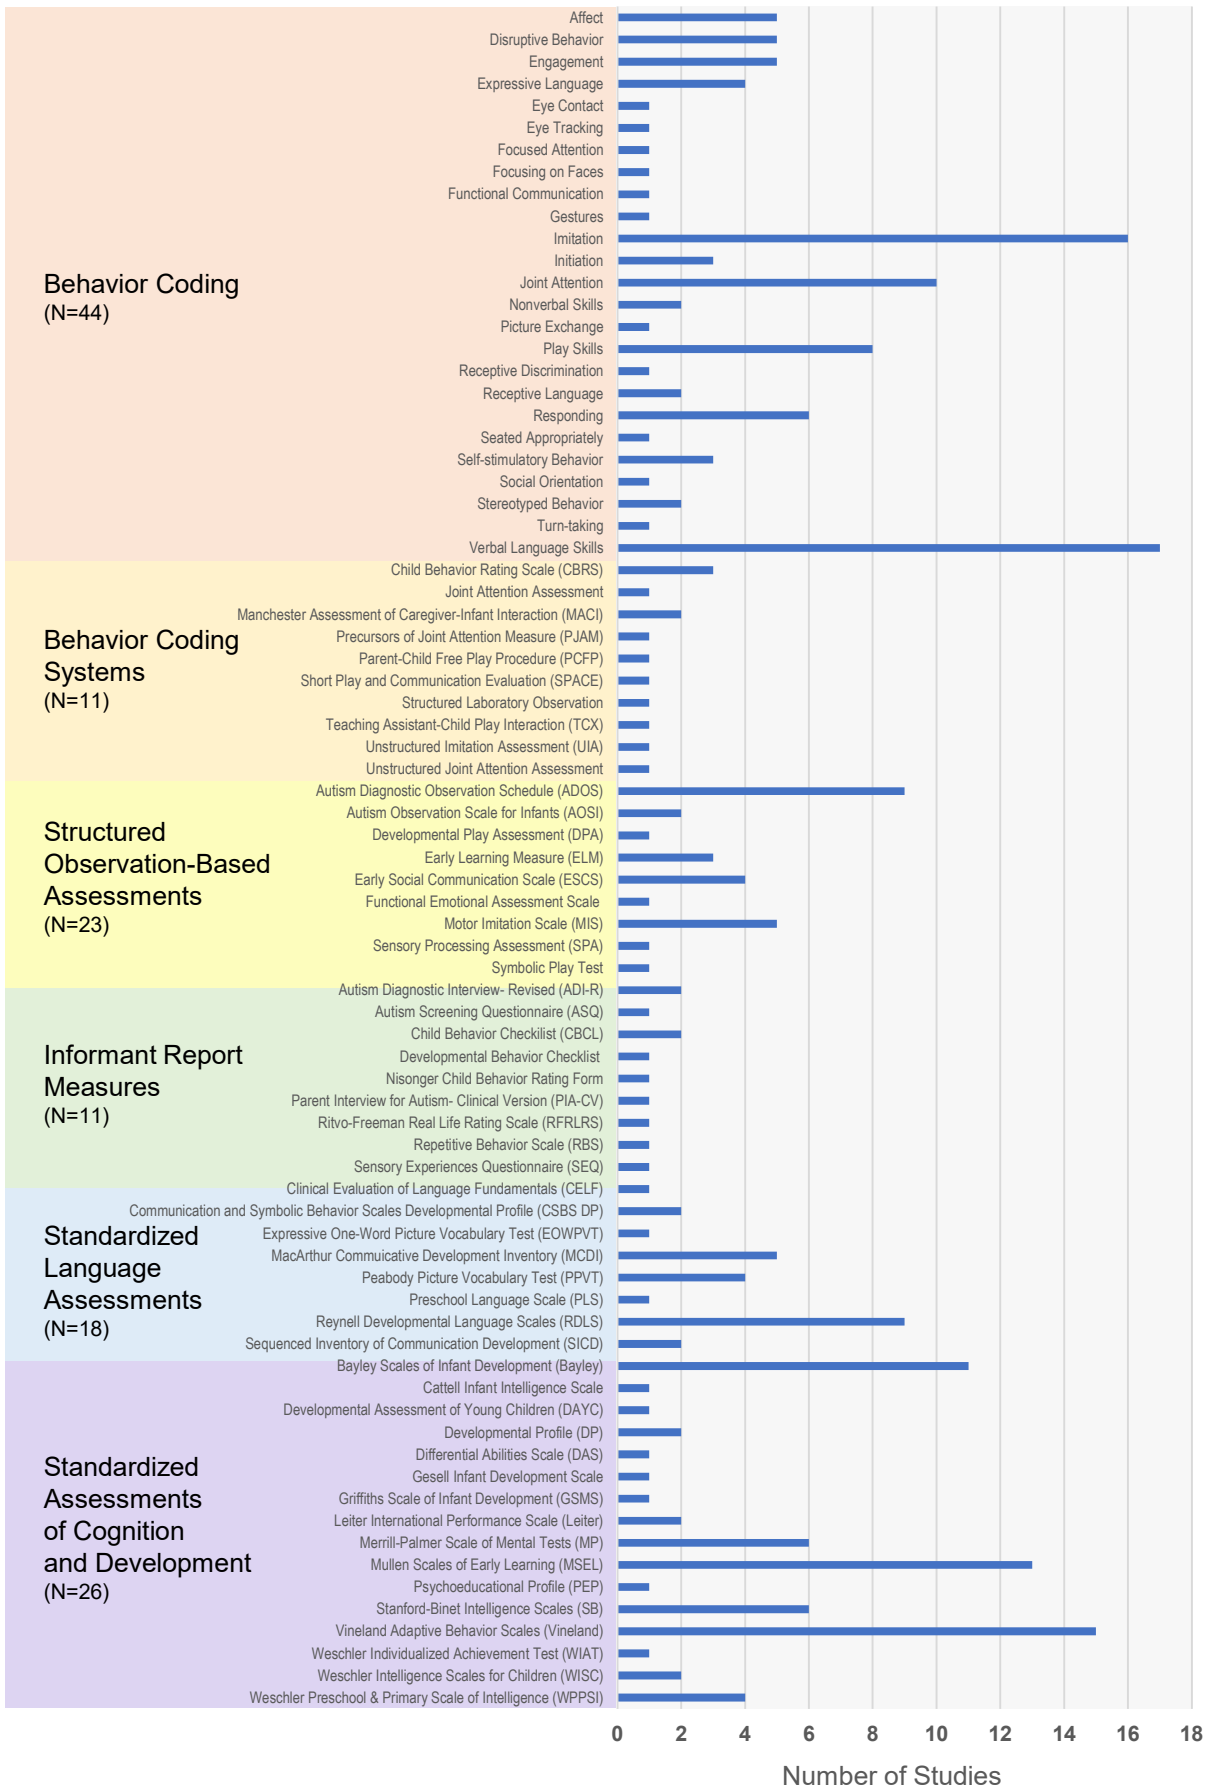

Supplement: NIHMS1809434-supplement-Supplementary_Figure_3.pdf [file NIHMS1809434-supplement-Supplementary_Figure_3.pdf]
